# Supplementary material for: Loss of MyD88 alters neuroinflammatory response and attenuates early Purkinje cell loss in a spinocerebellar ataxia type 6 mouse model
Source: PubMed Central journal article supplement — Hum Mol Genet. 2015 Jun 1;24(17):4780–91. doi: 10.1093/hmg/ddv202 (PMC4527484; doi:10.1093/hmg/ddv202), 2015-06-01

Supplemental Figure 1

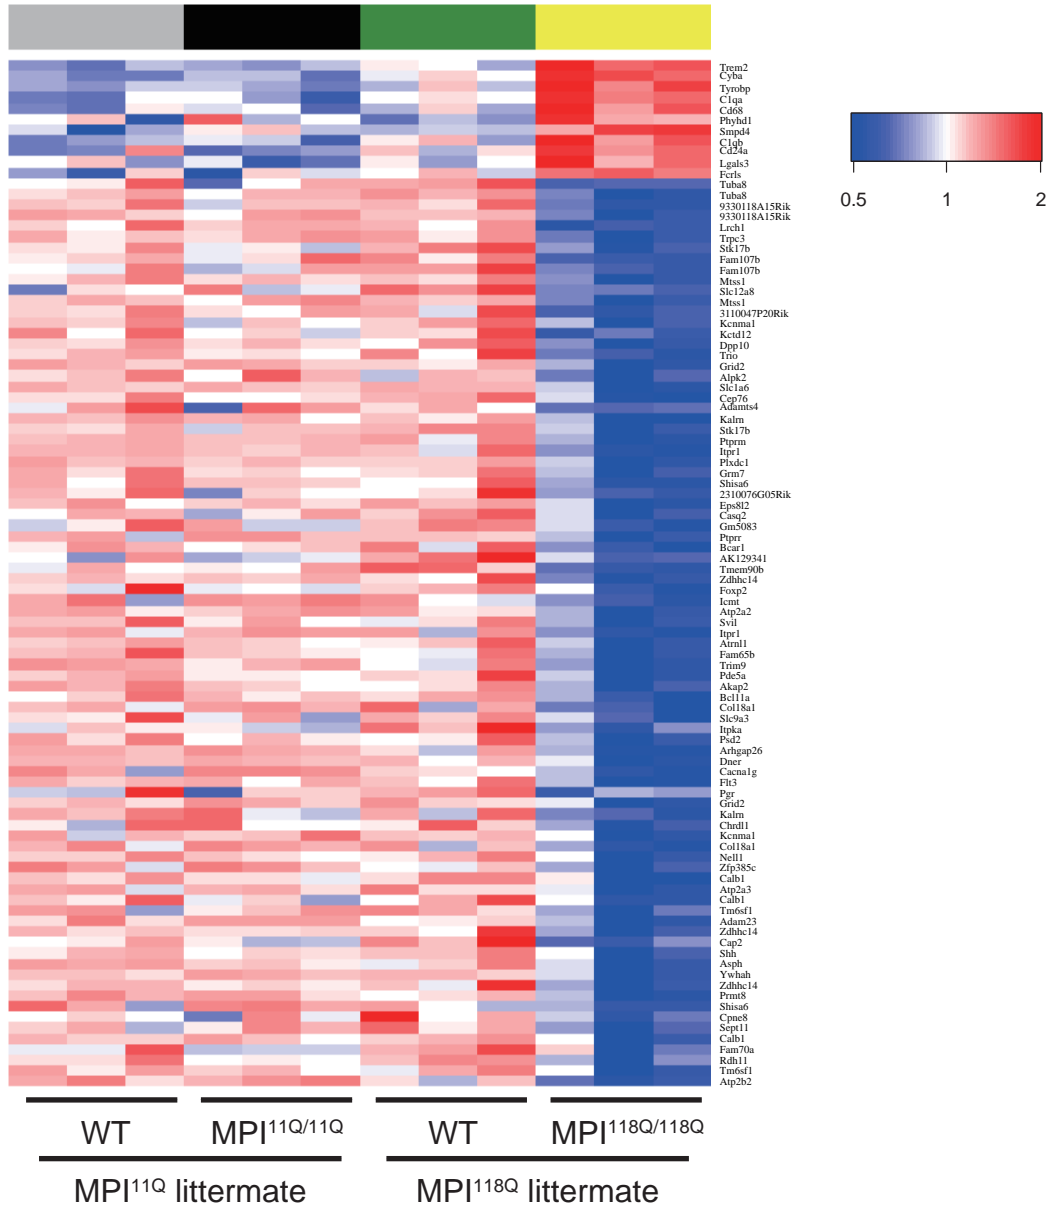



Supplemental Figure 3

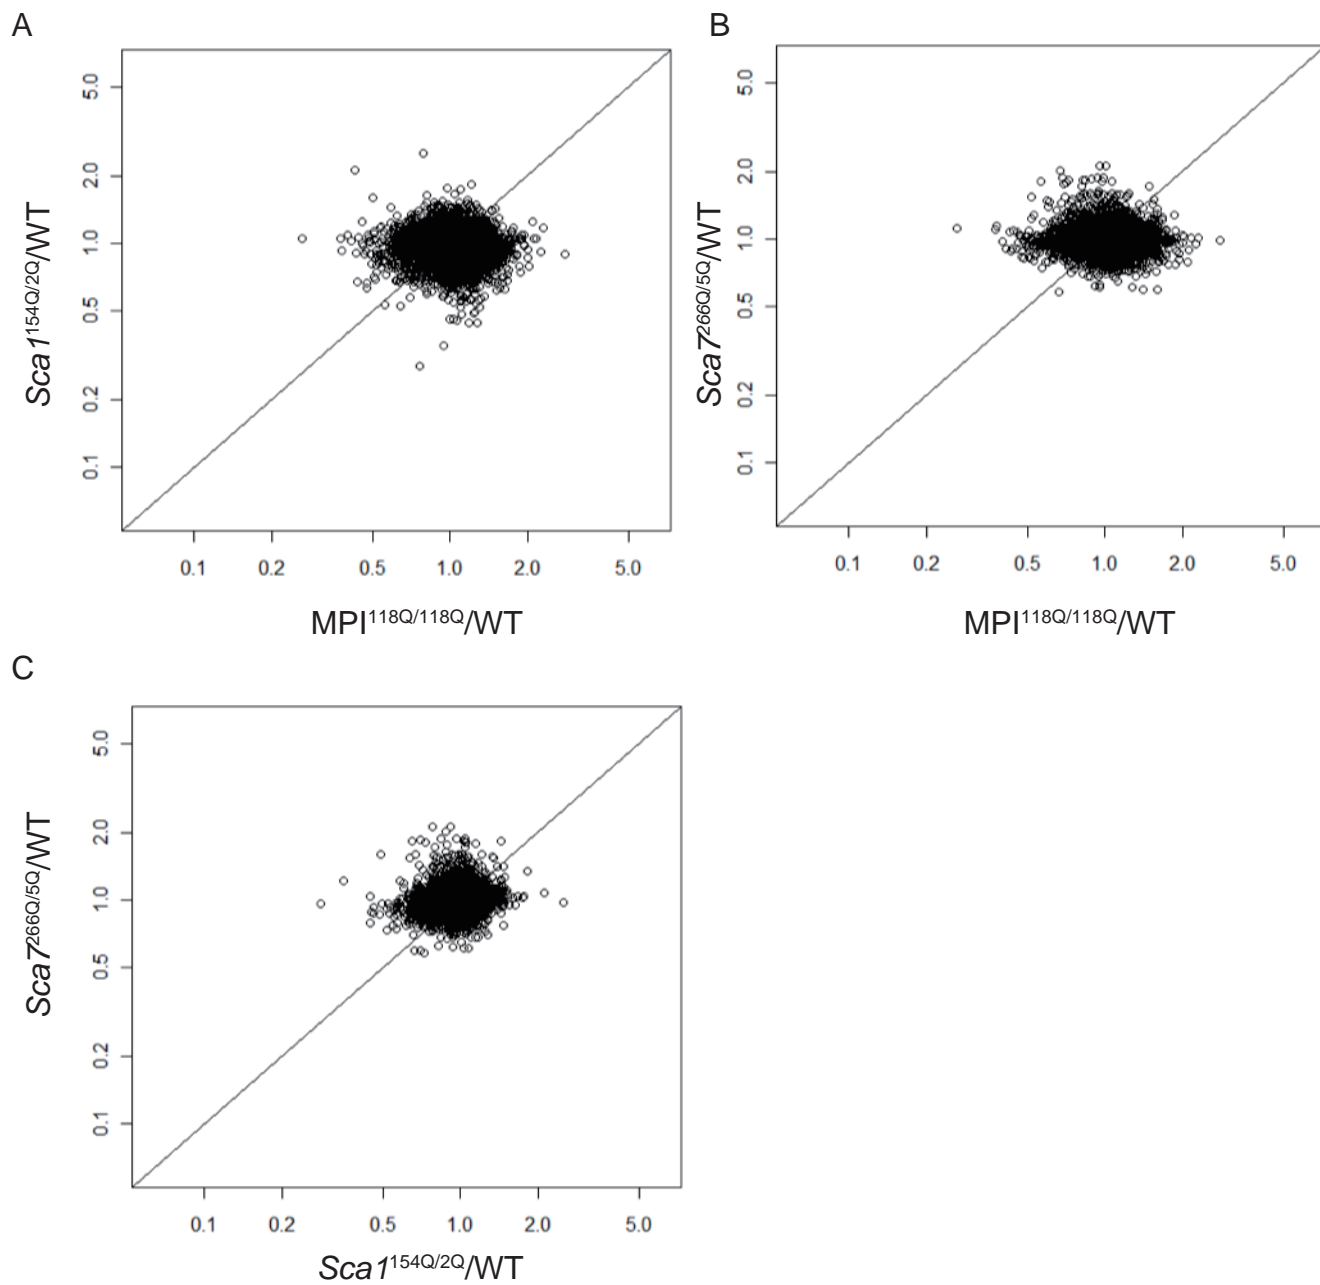

Supplemental Figure 4

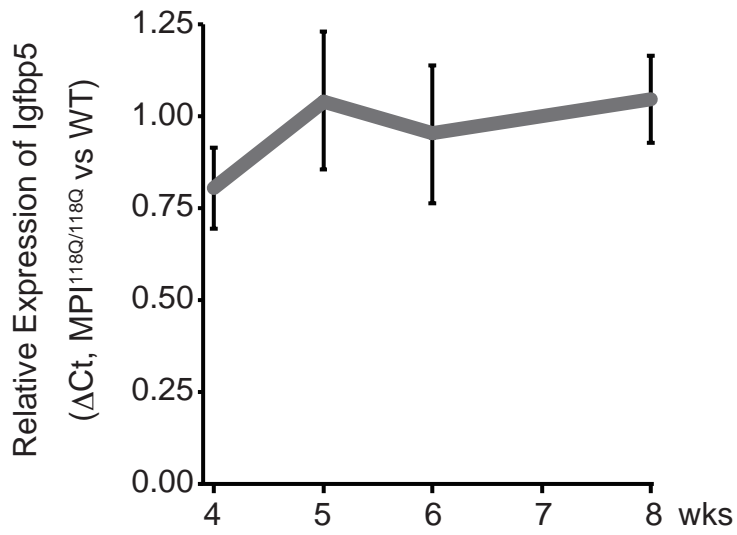

## Supplemental Figure 5

Sca1

| Gene Ontology term                                   | P-value |
|------------------------------------------------------|---------|
| BEHAVIOR                                             | < 0.001 |
| RHODOPSIN_LIKE_RECEPTOR_ACTIVITY                     | < 0.001 |
| LOCOMOTORY_BEHAVIOR                                  | < 0.001 |
| PEPTIDE_RECEPTOR_ACTIVITY                            | < 0.001 |
| POSITIVE_REGULATION_OF_TRANSLATION                   | < 0.001 |
| G_PROTEIN_COUPLED_RECEPTOR_ACTIVITY                  | < 0.001 |
| EXTRACELLULAR_SPACE                                  | < 0.001 |
| DIGESTION                                            | 0.004   |
| CHEMOKINE_RECEPTOR_BINDING                           | 0.001   |
| LIPASE_ACTIVITY                                      | 0.001   |
| POSITIVE_REGULATION_OF_CYTOKINE_BIOSYNTHETIC_PROCESS | < 0.001 |
| RESPONSE_TO_EXTERNAL_STIMULUS                        | < 0.001 |
| CHEMOKINE_ACTIVITY                                   | 0.001   |
| AMINE_RECEPTOR_ACTIVITY                              | 0.001   |
| G_PROTEIN_COUPLED_RECEPTOR_PROTEIN_SIGNALING_PATHWAY | < 0.001 |
| SECOND_MESSENGER_MEDIATED_SIGNALING                  | < 0.001 |
| G_PROTEIN_COUPLED_RECEPTOR_BINDING                   | < 0.001 |
| INFLAMMATORY_RESPONSE                                | < 0.001 |
| FEEDING_BEHAVIOR                                     | 0.012   |
| DEFENSE_RESPONSE                                     | < 0.001 |
| CATION_HOMEOSTASIS                                   | 0.001   |
| CARBOXYLESTERASE_ACTIVITY                            | 0.004   |
| RESPONSE_TO_WOUNDING                                 | < 0.001 |
| INTERLEUKIN_BINDING                                  | 0.006   |
| CELLULAR_CATION_HOMEOSTASIS                          | 0.001   |
| GLYCOSAMINOGLYCAN_BINDING                            | 0.005   |
| RNA_HELICASE_ACTIVITY                                | < 0.001 |
| ATP_DEPENDENT_HELICASE_ACTIVITY                      | < 0.001 |
| RESPONSE_TO_HYPOXIA                                  | < 0.001 |
| GOLGI_MEMBRANE                                       | < 0.001 |
| NUCLEAR_HORMONE_RECEPTOR_BINDING                     | 0.004   |
| HORMONE_RECEPTOR_BINDING                             | < 0.001 |
| TRANSPORT_VESICLE                                    | < 0.001 |
| RNA_SPLICINGVIA_TRANSESTERIFICATION_REACTIONS        | < 0.001 |
| NUCLEAR_PORE                                         | 0.005   |
| DNA_DIRECTED_RNA_POLYMERASEII_HOLOENZYME             | < 0.001 |

Supplemental Figure 6

*Sca6*<sup>14Q/14Q</sup>

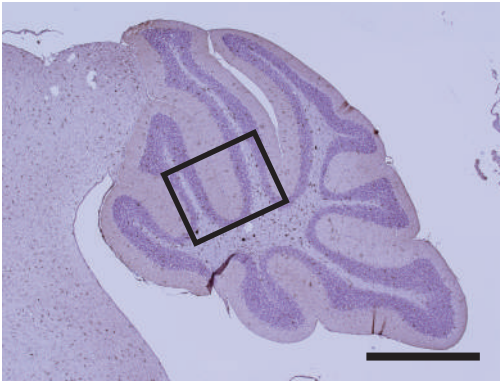

*Sca6*<sup>68Q/84Q</sup>

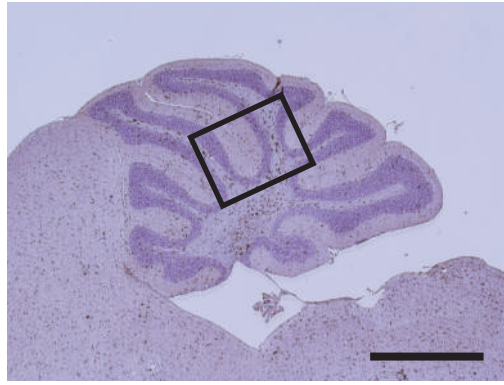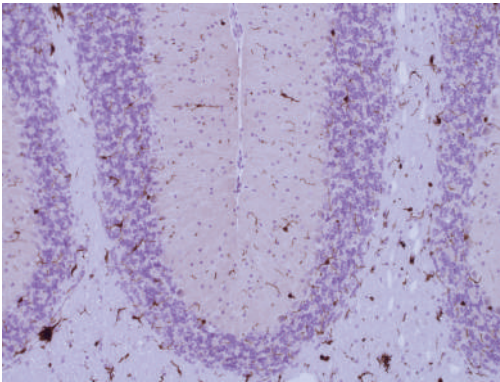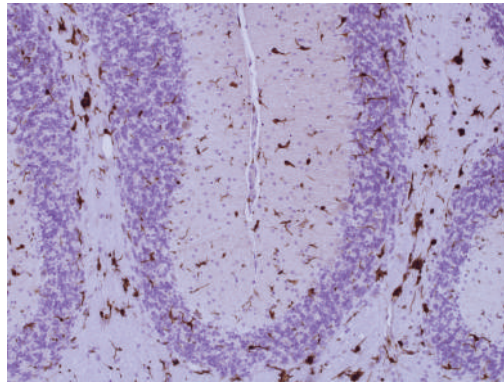

Supplemental Figure 7

A

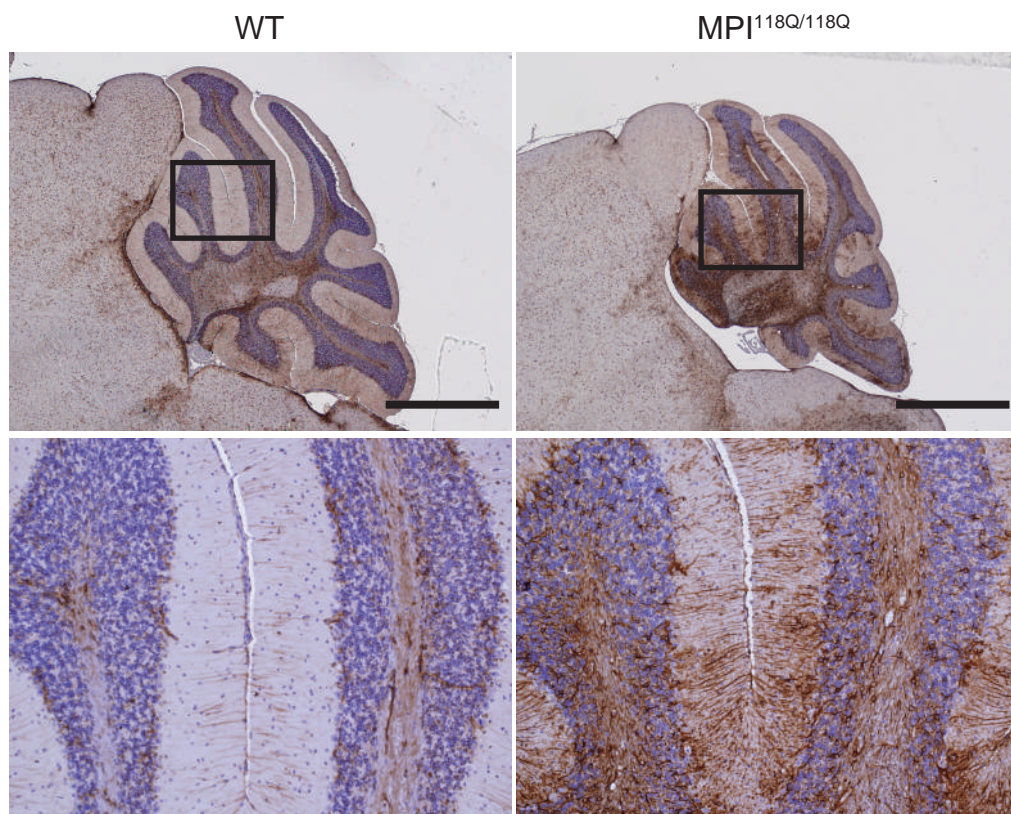

B

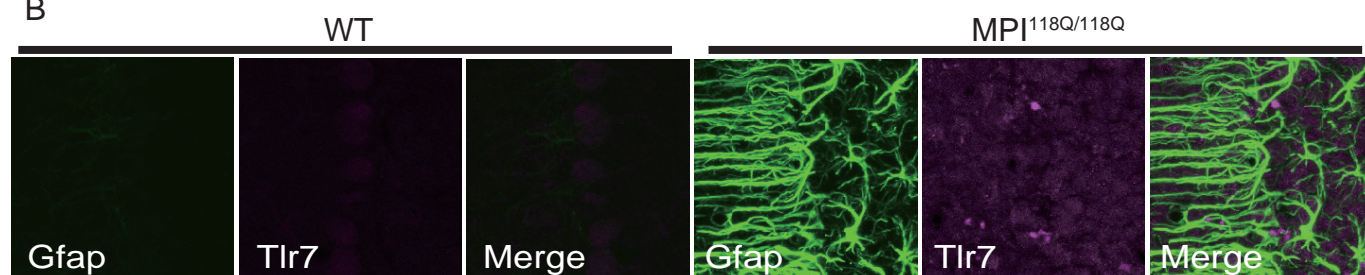

Supplemental Figure 8

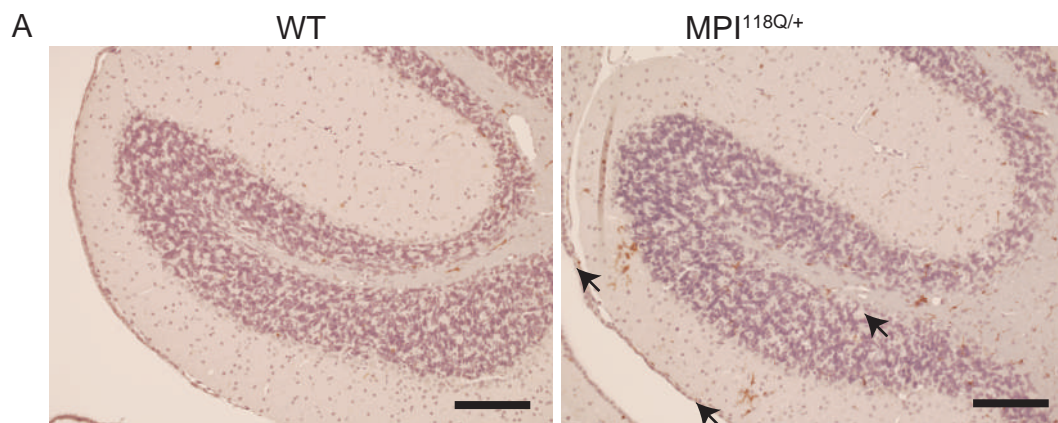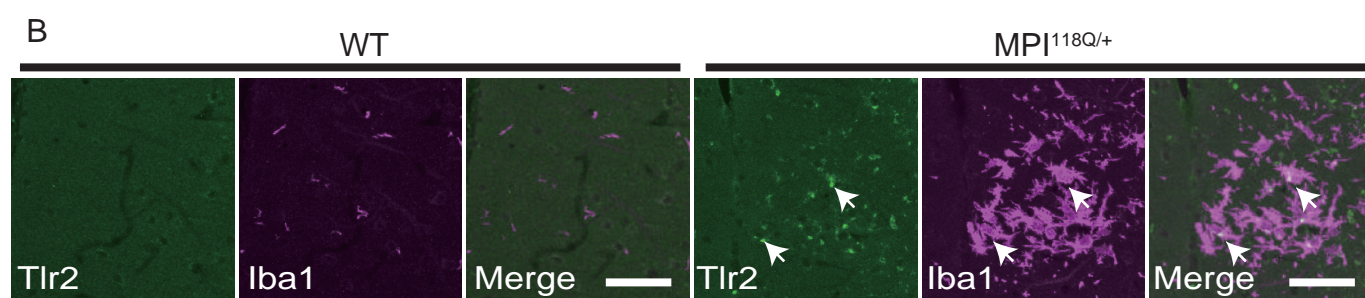



Supplemental Figure 9

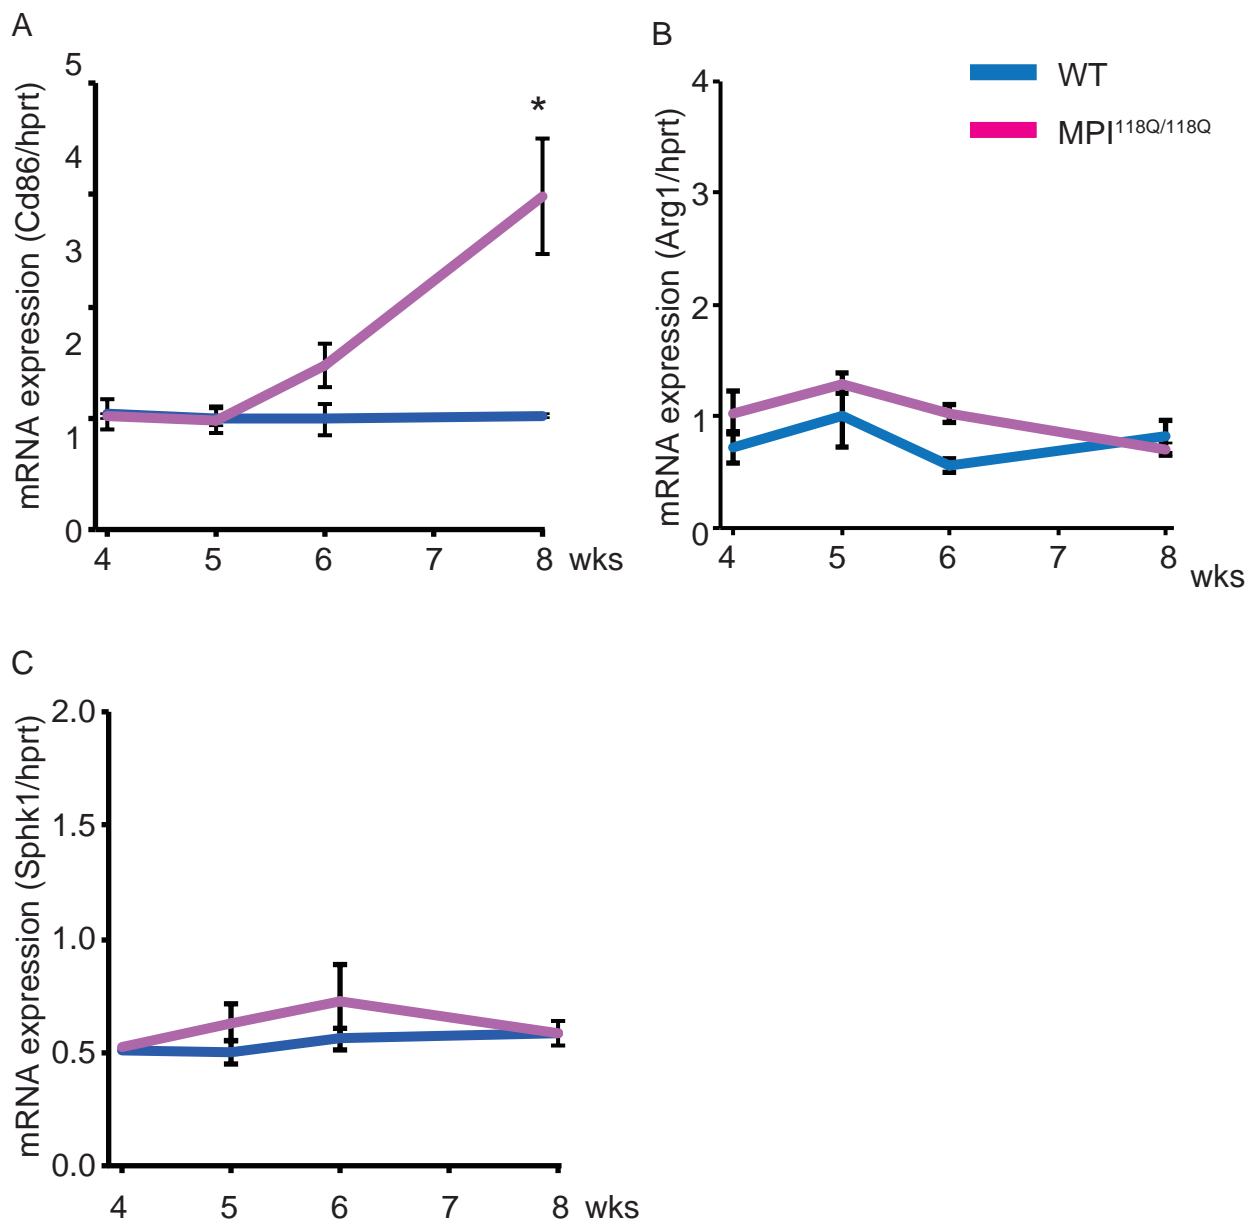

Supplemental Figure 10

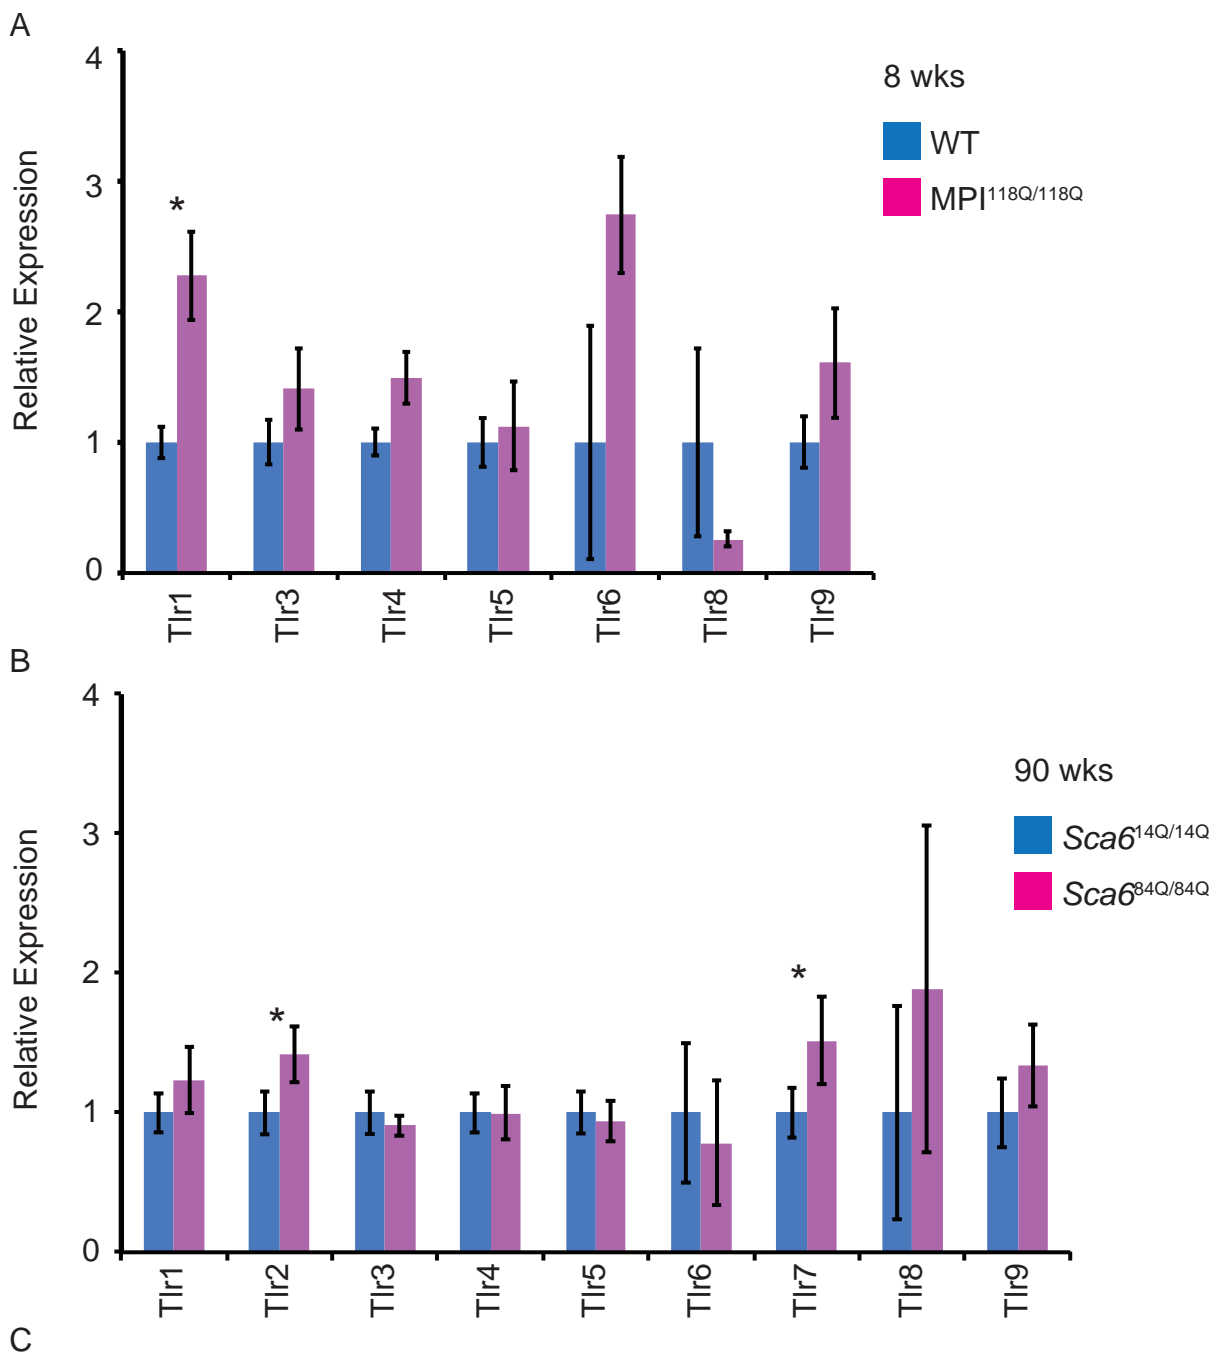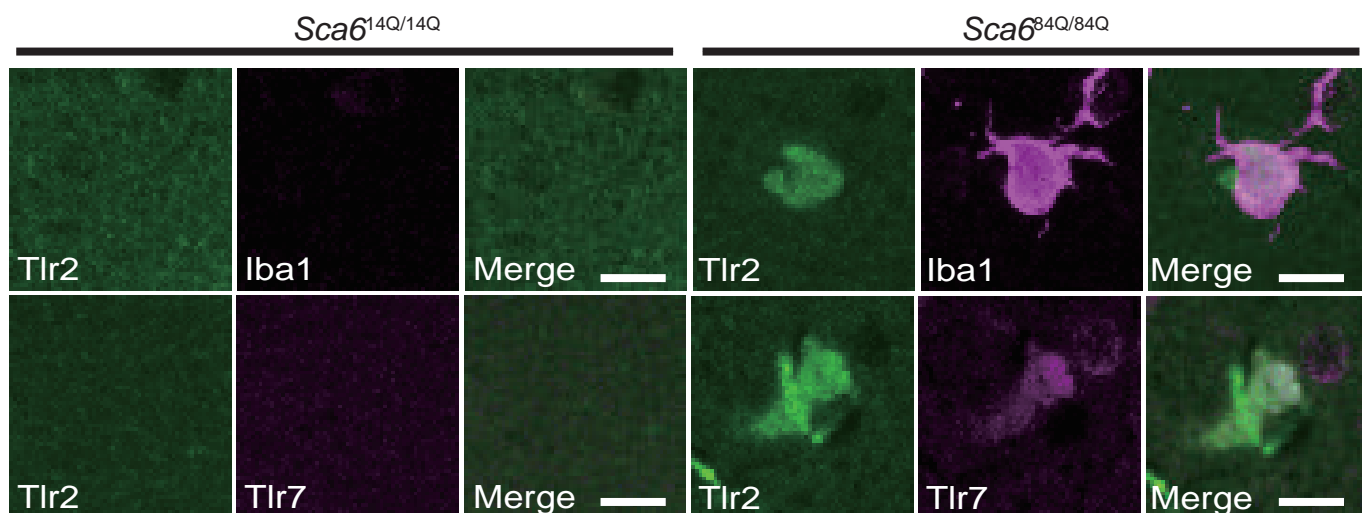

Supplemental Figure 11

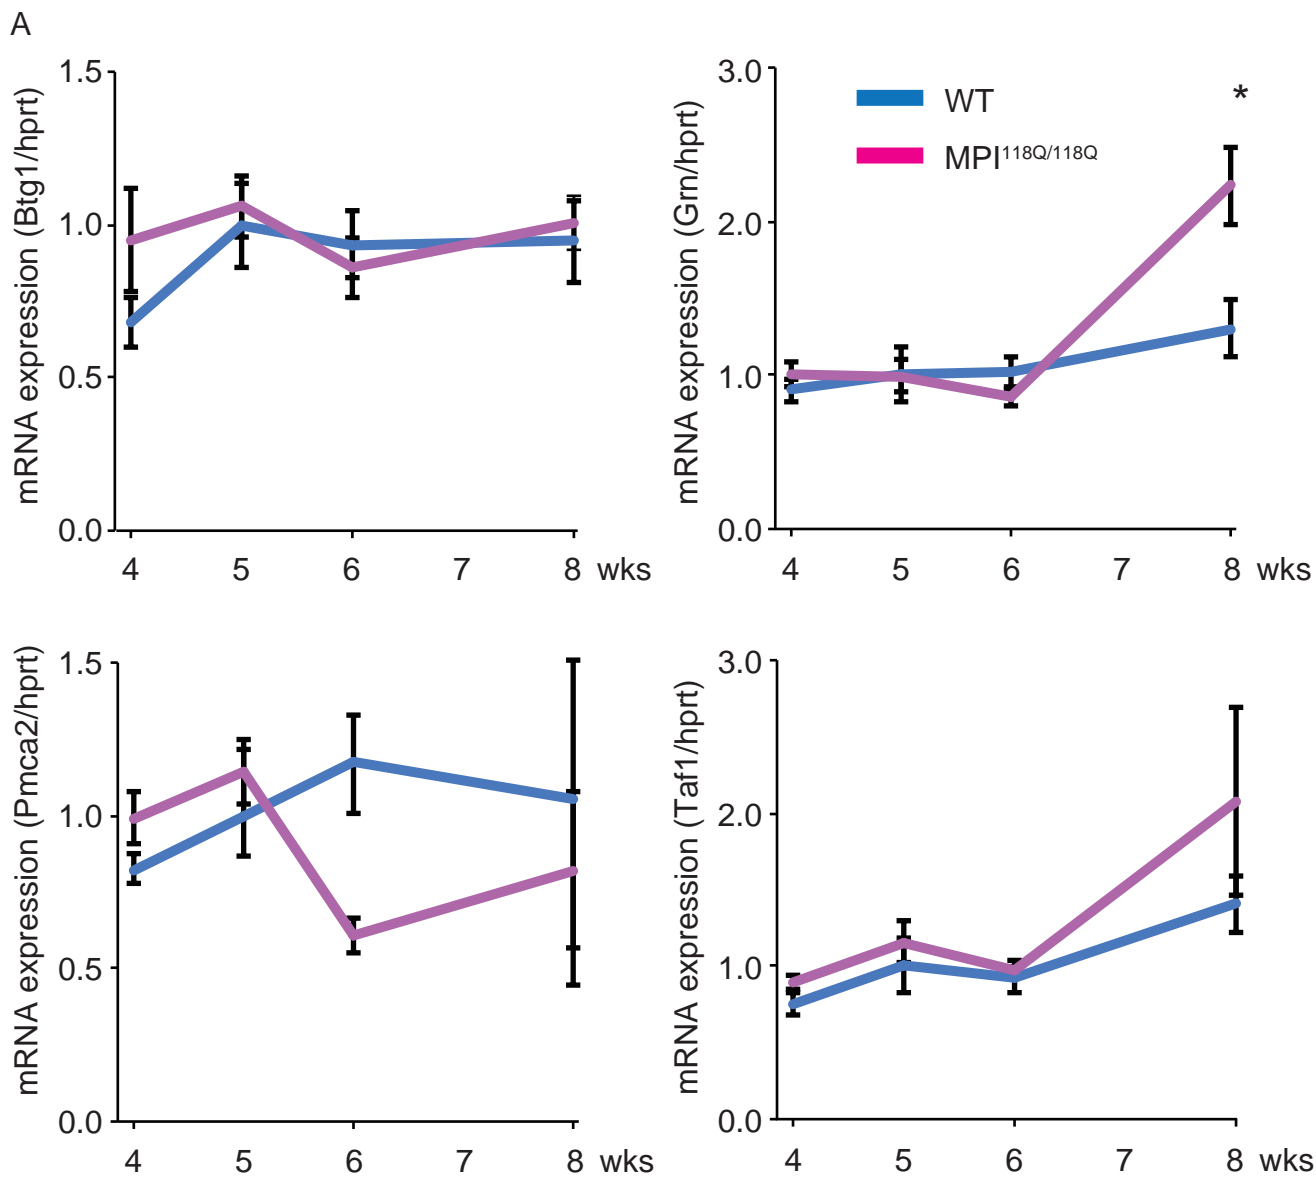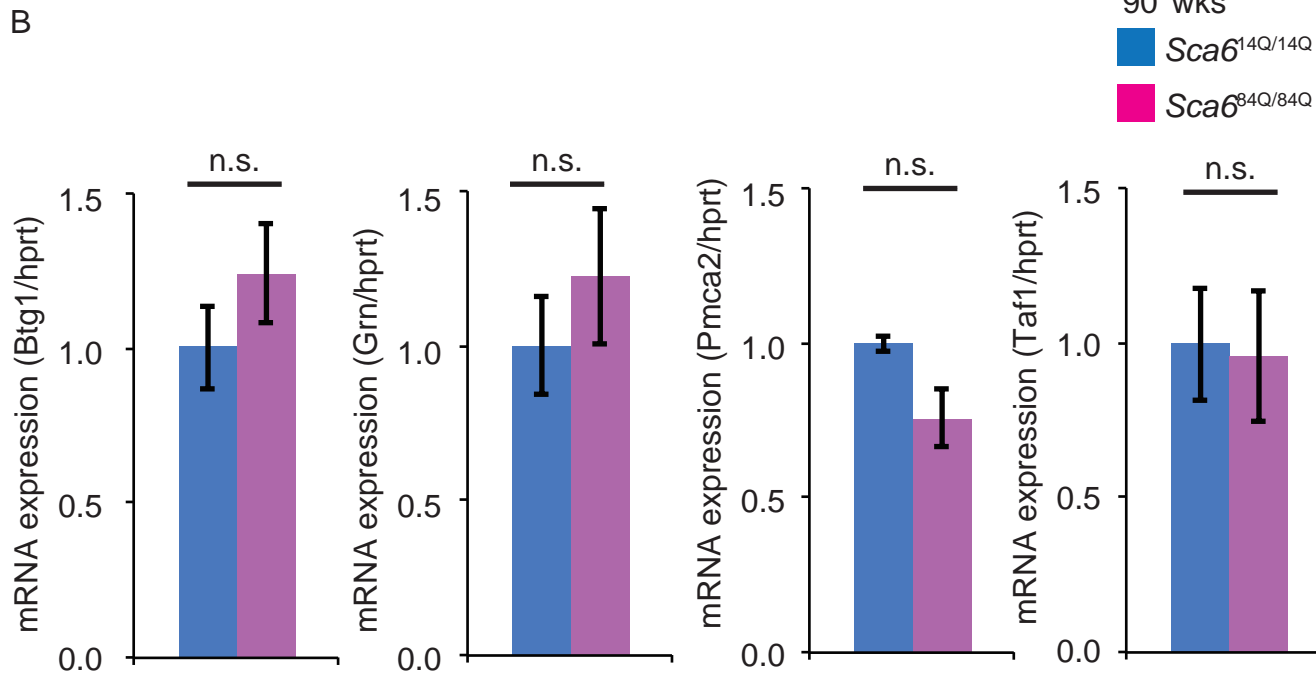

Supplemental Figure 12

A

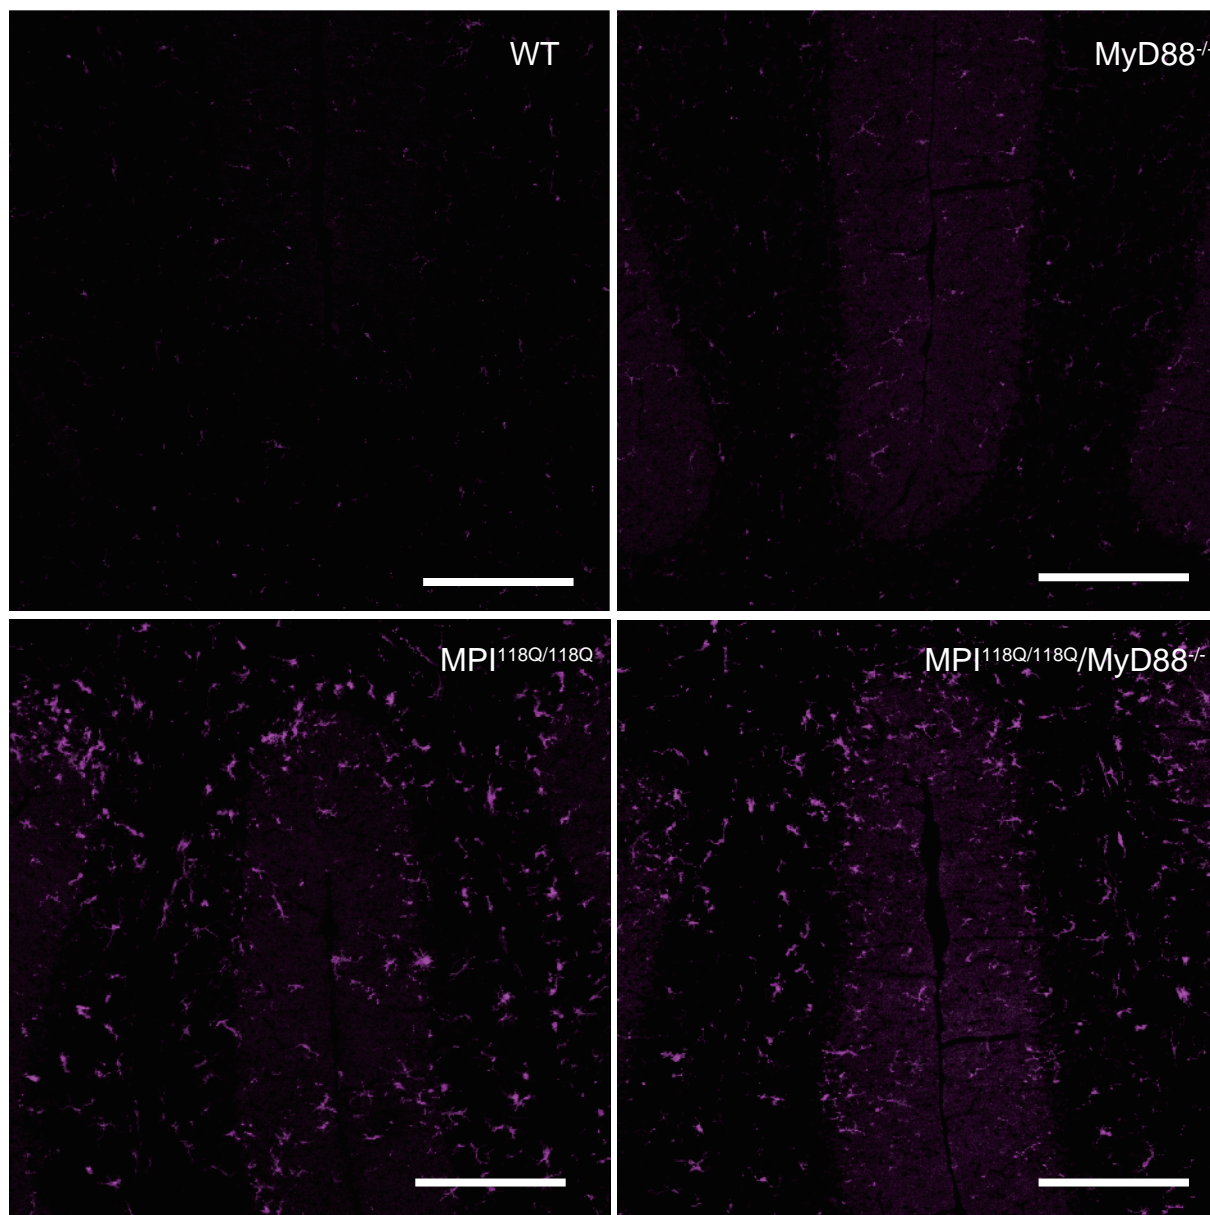

B

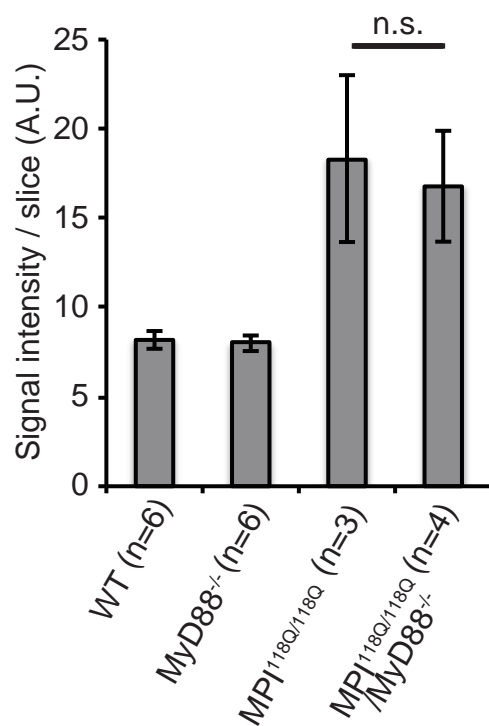

Supplemental Figure 13

A

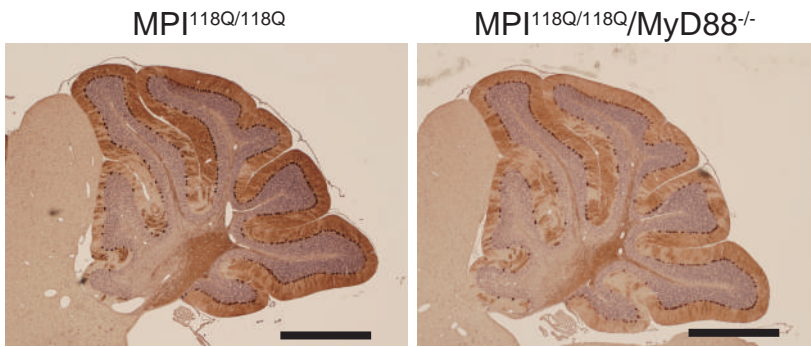

B

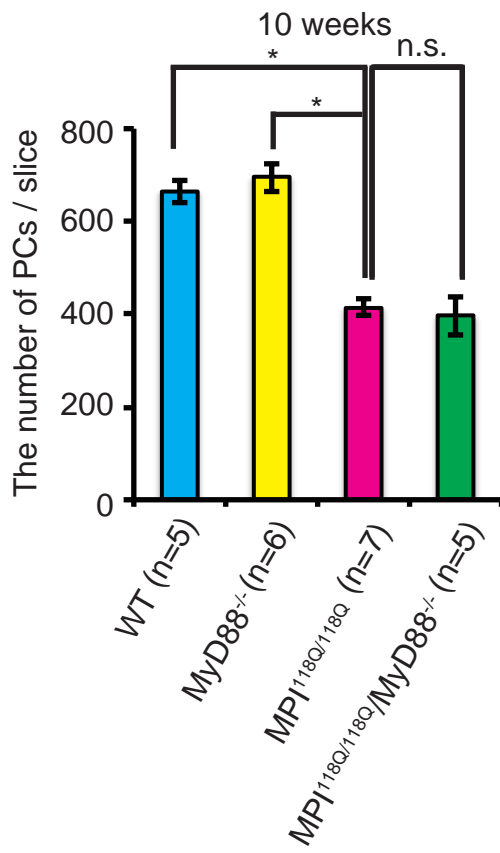

Supplement: supp_ddv202_ddv202supp_figs.pdf [file supp_ddv202_ddv202supp_figs.pdf]
